# Supplementary material for: Calibration of isotopologue-specific optical trace gas analysers: A practical guide
Source: Copernicus journal article supplement (doi:10.5194/amt-2018-187), 2018-06-25
Supplement: Supplementary file [file amt-2018-187-RC1-supplement.pdf]

1 Review of:

## 2 **Calibration of isotopologue-specific optical trace gas** 3 **analysers: A practical guide**

4 by David W. T. Griffith

### 5 **General comments:**

6 The manuscript is well written and very helpful for someone anyone working with isotopologue-  
7 specific optical trace gas analysers. Calibrating such instruments (or understanding the calibration)  
8 is a crucial element in this field and it fits well that this guide is published to bring everybody on the  
9 same page in this growing community. An important point is flawless calculations in this guide (I  
10 cannot find any) which was taken serious by the author by discussing/checking the calculations  
11 with several other experts in the field – as stated in the acknowledgement. In summary, this is a  
12 useful guide and is recommended to be published after a revision.

13 I have one major comment that regards the comparison of the two different ways to calibrate optical  
14 instruments and the suggestions made in this regards.

15 The few minor comments I have are mainly clarifications/deeper explanations about the underlying  
16 idea/calculations. The manuscript has an appreciated educational character and seems also to aim on  
17 students, so it might be worth to elaborate the mathematical idea a bit more at some points.

### 18 **Major comment:**

19 The author recommends using the “direct calibration by isotopologues amounts” due to its apparent  
20 advantages (no pressure dependence, the need of only one reference gas in different “dilutions”) as  
21 opposed to the calibration via different reference gases with different  $\delta$ -value (“Calibration by delta  
22 values”). I think this recommendation can only be done if the targeted precision in  $\delta$ -value is not  
23 exceeding the precision of the absolute concentrations of the reference gas and its “dilutions”. For  
24 example, the precision of CO<sub>2</sub> absolute concentration in reference gases from international  
25 reference labs is around 0.07 ppm<sup>1</sup>. The same type of labs can provide the  $\delta^{13}\text{C}(\text{CO}_2)$  in such gases  
26 using IRMS with a precision in the 0.02‰ range or better, while this  $\delta$ -value is relative to a material  
27 with a specific isotopic composition (reference material) and therefore independent of the absolute  
28 concentration of CO<sub>2</sub> in that gas. The 0.02‰ in  $\delta^{13}\text{C}(\text{CO}_2)$  corresponds to a precision in absolute  
29 concentration of about 0.008 ppm (for a 400 ppm concentration gas), so about one order of  
30 magnitude better than the absolute concentration actually can be known (in absolute, SI-traceable  
31 fashion).

32 As far I understand the recommended calibration approach, it ultimately depends on the precision of  
33 the absolute CO<sub>2</sub> concentration of the used gases. Since the current limit of these values is around  
34 0.07 ppm, the corresponding precision in  $\delta^{13}\text{C}(\text{CO}_2)$  cannot be better than about 0.2‰ (exceptions  
35 exist if the measured value is very close to the used reference gas in the calibration). If the user  
36 dilutes its reference gas in a self-made experiment, it’s very likely that the dilution process will  
37 introduce additional uncertainty making the in  $\delta^{13}\text{C}(\text{CO}_2)$  precision (and obviously also the  
38 precision of the absolute CO<sub>2</sub> concentration) worse.

39 This disadvantage of the “direct calibration by isotopologues amounts” has to be addressed in the  
40 manuscript and the suggestion has to be adapted accordingly. A 0.2‰ in  $\delta^{13}\text{C}(\text{CO}_2)$  is one order of  
41 magnitude above the GAW recommendations<sup>2</sup> for which reason the proposed calibration method  
42 seems not applicable for instruments applied in the context of GAW. Some of the references used in  
43 the manuscript as an example of the alternative “Calibration by delta values” are used in the GAW  
44 context with corresponding precision targets. So the context of these references has to be  
45 reconsidered.

### 46 **Minor comments:**

47 -Clumped isotopes are mentioned a few times in the manuscript, but there is no example of it. It  
48 would be nice to have an example for the uneducated reader. In general, one could consider to  
49 extend table 2 with all 18 (or 12 distinct) possible isotopologues as an overview and list its  
50 abundances (as much as known) as an overview.

51 -Page 4, line 2 and following formulas: you shorten from  $n(^{12}\text{C})$  to  $^{12}\text{C}$ . I recommend to not do this  
52 because it complicates the comparison with the previous formulas and the shortening is only used in  
53 the following formulas (as much I can see).

54 -Page 4, line 11-16: This section is not very clear to me. You only take 4 distinct isotopologues into  
55 consideration, but  $R_{sum}$  seems to be the sum of all 18 (according to the current text). Or how do I  
56 have to understand this?  $R_{sum}$  seems to be a rather abstract parameter, or does it have any easy-  
57 understandable meaning?

58 -Page 7, line 35 and following: IRMSs can also be used to measure absolute abundances of the  
59 single isotopologues, but the measurement is in general noisy and very difficult to calibrate. This  
60 “absolute” approach has been used in the beginning of mass spectrometry before it has been  
61 realized that a relative measurement with IRMS is much more precise than an absolute  
62 measurement<sup>3</sup>. This is also the case for isotopologue-specific optical systems. The noise in a line  
63 ratio is much smaller than the noise of the individual lines because there is a lot of  
64 correlated/technical noise on two simultaneously measured lines which cancels out in a ratio (given  
65 that the instrument can measure the targeted lines simultaneously in real-time as possible e.g. with a  
66 direct absorption spectrometer). It’s not due to the nature of IRMS that the community has  
67 converged to go for relative  $\delta$ -scales, but rather due to the more fundamental analytical advantage  
68 of measuring relative values with respect to a reference material as opposed to absolute  
69 measurements.

70

## 71 **References:**

- 72 1. Zhao CL, Tans PP. Estimating uncertainty of the WMO mole fraction scale for carbon  
73 dioxide in air. *J Geophys Res Atmos.* 2006;111(8):1-10. doi:10.1029/2005JD006003
- 74 2. WMO. 18th WMO/IAEA meeting on carbon dioxide, other greenhouse gases and related  
75 measurement techniques (GGMT-2015). *GAW Rep No 229.* 2016;(229):13-17.  
76 [https://library.wmo.int/opac/doc\\_num.php?explnum\\_id=3074](https://library.wmo.int/opac/doc_num.php?explnum_id=3074).
- 77 3. Criss RE. *Principles of Stable Isotope Geochemistry.* Oxford University Press; 1999.  
78 doi:10.1016/S0037-0738(97)00056-0

79
